# Supplementary material for: Editing-defective tRNA synthetase causes protein misfolding and neurodegeneration
Source: Springer Nature journal article supplement (doi:10.1038/nature05096), 2006-08-13
Supplement: nature05096-s9.pdf [file nature05096-s9.pdf]

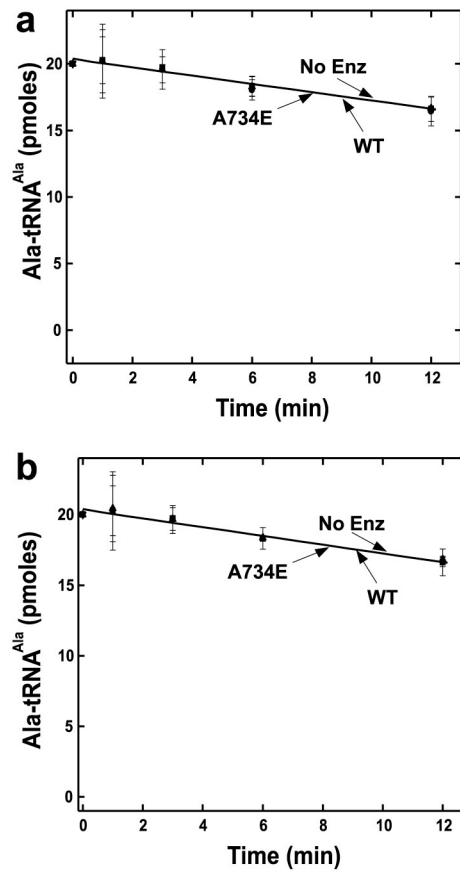

**Supplementary Figure 8.** Normal deacylation of Ala-tRNA<sup>Ala</sup> by A734E AlaRS. Deacylation of [<sup>3</sup>H]-Ala-tRNA<sup>Ala</sup> (6.2 μM) by human (a) or mouse (b) AlaRS (8 nM) at 26 °C (pH 7.5). Reactions were quenched and tRNA precipitated in 200 μl 5 % TCA (0.1% BSA) in PVDF MultiScreen filter plates. Scintillation counting was performed on the filtrate containing the liberated amino acid.
